# Supplementary material for: Mangiferin Has an Additive Effect on the Apoptotic Properties of Hesperidin in Cyclopia sp. Tea Extracts
Source: PubMed Central journal article supplement (PMC3954868; doi:10.1371/journal.pone.0092128), 2014-03-14
Supplement: pone.0092128.s001.pdf [file pone.0092128.s001.pdf]

| Gene             | Forward primer (5'-> 3')       | Reverse primer (5'-> 3')       |
|------------------|--------------------------------|--------------------------------|
| BAD              | CCC AGA GTT TGA GCC GAG TG     | CCC ATC CCT TCG TCG TCC T      |
| BAX              | TTC CGA GTG GCA GCT GAC AT     | TTC CAG ATG GTG AGT GAG GC     |
| BCL10            | GTG AAG AAG GAC GCC TTA GAA A  | TCA ACA AGG GTG TCC AGA CCT    |
| BCL2             | GGT GAA CTG GGG GAG GAT TGT    | CTT CAG AGA CAG CCA GGA GAA    |
| BCL2L2           | GCG GAG TTC ACA GCT CTA TAC    | AAA AGG CCC CTA CAG TTA CCA    |
| beta actin       | CAT GTA CGT TGC TAT CCA GGC    | CTC CTT AAT GTC ACG CAC GAT    |
| BID              | ATG GAC CGT AGC ATC CCT CC     | GTA GGT GCG TAG GTT CTG GT     |
| BIK              | GAC CTG GAC CCT ATG GAG GAC    | CCT CAG TCT GGT CGT AGA TGA    |
| BIP              | GTT CTT GCC GTT CAA GGT GG     | TGG TAC AGT AAC AAC TGC ATG    |
| BIRC6            | CAG CAG CTC TTA TCA GCA TGT    | AAC TGT GGC CCA CTT AGC AAC    |
| BIRC7            | GCT CTG AGG AGT TGC GTC TG     | CAC ACT GTG GAC AAA GTC TCT T  |
| BIRC8            | GCG CTC AGA AAG ACA CTA CAG    | CCT CTT GCA GAC GCC TTA GC     |
| BOK              | GTC TTC GCT GCG GAG ATC AT     | CAT TCC GAT ATA CGC TGG GAC    |
| CARD18 (ICEBERG) | TGG GTG CAG GCA CAA TAA ATG    | TTG AGG CAA GTT GAG GGT CTT    |
| CARD6            | GAG CAC GTT GGA TAT GAT GGT G  | GGT CCA CTT ACA TCC TCG ATC TA |
| CARD9            | CCC TCA CGC ATC ACA CCT TAC    | GCA CAC CCA CTT TCC GTT TG     |
| CASP10           | TAG GAT TGG TCC CCA ACA AGA    | GAG AAA CCC TTT GTC GGG TGG    |
| CASP2            | AGC TGT TGT TGA GCG AAT TGT    | AGC AAG TTG AGG AGT TCC ACA    |
| CASP4            | CAA GAG AAG CAA CGT ATG GCA    | AGG CAG ATG GTC AAA CTC TGT A  |
| CASP6            | CAC CAA CAT AAC TGA GGT GGA TG | AGG AGG AGC CAT ATT TTC CCA    |
| CASP7            | CGG TCC TCG TTT GTA CCG TC     | CGC CCA TAC CTG TCA CTT TAT CA |
| CASP8AP2         | ACA CAG TCG AGT AGA CTC TCA AA | AGG AAG TGA TGC TCG TTC AGA    |
| CRADD            | CAT CAG ACC GGC AGA TTA ACC    | GTT GGC CTT ACA GCG GTA GAT    |
| DEDD             | GGA GAC ATC AAT TCG CTA TGT GA | GCA ACA CAC CAC AGG ATA GTG    |
| DEDD2            | TGA AGG CAA AGT GAC CTG TGA    | AGG CGT CCA GAT AGG AGA GC     |
| FADD             | GCT GGC TCG TCA GCT CAA A      | ACT GTT GCG TTC TCC TTC TCT    |
| FASLG            | CTC CGA GAG TCT ACC AGC CA     | TGG ACT TGC CTG TTA AAT GGG    |
| GAPDH            | AGA AGG CTG GGG CTC ATT TG     | AGG GGC CAT CCA CAG TCT TC     |
| HIP1             | ACA CGC CAG AAC GTG CAT A      | CAC TGC GTT GCT AGA CAG AG     |
| MCL1             | TGC TTC GGA AAC TGG ACA TCA    | TAG CCA CAA AGG CAC CAA AAG    |
| NAIP             | AAG GGA TTT GTT GAC ATA ACG GG | CAG CCG TAG TTC TTC GTA AGC    |
| NFKB2            | ATG GAG AGT TGC TAC AAC CCA    | CTG TTC CAC GAT CAC CAG GTA    |
| PEA15            | GGA GAG CCA CAA CAA GCT G      | CCA TAG TGA GTA GGT CAG GAC G  |
| PIDD             | TCA GAG GAT TCG GAC GCA G      | GTG AGT GCT CAG ACG CAA GAA    |
| PYCARD           | TGG ATG CTC TGT ACG GGA AG     | CCA GGC TGG TGT GAA ACT GAA    |
| REL              | ACA TGG TAA TTT GAC GAC TGC T  | GCT TCC CAA TCG TTC AAC ACA    |
| RELA             | ATG TGG AGA TCA TTG AGC AGC    | CCT GGT CCT GTG TAG CCA TT     |
| RELB             | CAG CCT CGT GGG GAA AGA C      | GCC CAG GTT GTT AAA ACT GTG C  |
| <b>TNFRSF25</b>  | CCG TCC AGT TGG TGG GTA AC     | CCA TCA CGT CGT AGA GCT GC     |
| TP53 (p53)       | CAG CAC ATG ACG GAG GTT GT     | TCA TCC AAA TAC TCC ACA CGC    |
| <b>TRADD</b>     | GCT GTT TGA GTT GCA TCC TAGC   | CCG CAC TTC AGA TTT CGC A      |
| WAF1(p21)        | TGT CCG TCA GAA CCC ATG C      | AAA GTC GAA GTT CCA TCG CTC    |
| XIAP             | ACC GTG CGG TGC TTT AGT T      | TGC GTG GCA CTA TTT TCA AGA TA |
